# Supplementary material for: Proteogenomic Workflow Reveals Molecular Phenotypes Related to Breast Cancer Mammographic Appearance
Source: J Proteome Res. 2021 Apr 15;20(5):2983–3001. doi: 10.1021/acs.jproteome.1c00243 (PMC8155562; doi:10.1021/acs.jproteome.1c00243)
Supplement: Supplementary file 3 — pr1c00243_si_003.xlsx [file pr1c00243_si_003.xlsx]

## Sheet: Sheet1
Table S3. Data Independent Acquisition settings
Method	Runtime	Resolution	Microscans	AGC*	Scan range (m/z)	Isolation window (m/z)	Max IT (ms)**	First mass (m/z)	FWHM (s)***	NCE†
DIA - 01	0 to 120min	30000	1	1000000	n/a	13	120	140	15	30
DIA - 02	0 to 120min	30000	1	1000000	n/a	14	120	140	15	30
DIA - 03	0 to 120min	30000	1	1000000	n/a	15	120	140	15	30
DIA - 04	0 to 120min	30000	1	1000000	n/a	16	120	140	15	30
DIA - 05	0 to 120min	30000	1	1000000	n/a	17	120	140	15	30
DIA - 06	0 to 120min	30000	1	1000000	n/a	18	120	140	15	30
DIA - 07	0 to 120min	30000	1	1000000	n/a	20	120	140	15	30
DIA - 08	0 to 120min	30000	1	1000000	n/a	22	120	140	15	30
DIA - 09	0 to 120min	30000	1	1000000	n/a	23	120	140	15	30
DIA - 10	0 to 120min	30000	1	1000000	n/a	25	120	140	15	30
DIA - 11	0 to 120min	30000	1	1000000	n/a	29	120	140	15	30
DIA - 12	1 to 120min	30000	1	1000000	n/a	37	120	140	15	30
DIA - 13	2 to 120min	30000	1	1000000	n/a	45	120	140	15	30
DIA - 14	3 to 120min	30000	1	1000000	n/a	66	120	140	15	30
DIA - 15	4 to 120min	30000	1	1000000	n/a	132	120	140	15	30
Full MS - SIM	0 to 120min	60000	1	3000000	390-1210	n/a	100	n/a	15	n/a
Acronyms
*: Automatic Gain Control
**: Injection Time
***: Full Width Half Maximum
†: Normalized Collision Energy
